# Supplementary material for: A bionic stem-shaped copper-doped aniline–pyrrole copolymer composite photothermal sponge evaporator for seawater desalination and sewage treatment
Source: Royal Society of Chemistry journal article supplement (doi:10.1039/d5ta09925k), 2026-01-01
Supplement: d5ta09925k1.pdf [file d5ta09925k1.pdf]

1 **A bionic stem-shaped copper-doped aniline-pyrrole copolymer composite photothermal**  
2 **sponge evaporator for seawater desalination and sewage treatment**

3 Yongjie Lao <sup>a</sup>, Yusheng Wang <sup>a</sup>, Qiao Zhang\* <sup>a</sup>, Feipeng Du <sup>a</sup>, ChakYin Tang <sup>b</sup>, ChiPong Tsui  
4 <sup>b</sup>, Yunfei Zhang\* <sup>a</sup>

5 <sup>a</sup> School of Materials Science and Engineering, Wuhan Institute of Technology, Wuhan  
6 430205, China

7 <sup>b</sup> Department of Industrial and Systems Engineering, The Hong Kong Polytechnic University,  
8 Hung Hom, Hong Kong, People's Republic of China

9 \*Corresponding Author (s): booyou@163.com (Q. Zhang); zyf3006@126.com (Y. Zhang)

10 **Calculation of the evaporation rate and the efficiency**

11 The evaporation rate ( $\dot{m}$ ) and energy conversion efficiency ( $\eta$ ) are calculated using equations  
12 (1-4) as detailed below <sup>1,2</sup>:

13 
$$\dot{m} = \frac{m}{At} \dots \dots \dots (1)$$

14 
$$U_{in} = \Delta H_{vap} m_0 = \Delta H_{equ} m_g \dots \dots \dots (2)$$

15 
$$h_{lv} = \lambda_{lv} + C_p(T_1 - T_0) \dots \dots \dots (3)$$

16 
$$\eta = \frac{\dot{m} h_{lv}}{q} \times 100\% \dots \dots \dots (4)$$

17 In formula (1-4):  $m$  represents the water mass loss (g) in the evaporator;  $A$  represents the area  
18 of light that the evaporator is exposed to ( $m^2$ );  $t$  represents the duration of evaporation (h);  $m$   
19 is the evaporation rate ( $kg\ m^{-2}\ h^{-1}$ ).  $\Delta H_{vap}$  represents the enthalpy of evaporation of pure  
20 water at  $2257\ J\ g^{-1}$ , and  $m_0$  represents the dark evaporation of pure water.  $\Delta H_{equ}$  is the  
21 equivalent enthalpy of evaporation ( $J\ g^{-1}$ ) of water in the evaporator, and  $m_g$  is the dark  
22 evaporation of water in the evaporator.  $U_{in}$  is an energy input from the outside.  $\lambda_{lv}$  is latent  
23 heat [equivalent to the equivalent enthalpy of evaporation  $\Delta H_{equ}$  in (2)];  $C_p(T_1 - T_0)$  is the  
24 sensible heat in the evaporation system, where  $C_p$  is the specific heat capacity of water,  $T_1$  is  
25 the steady-state temperature of the material,  $T_0$  is the initial temperature of the material, and

1  $h_{lv}$  is the enthalpy of phase transition in evaporation ( $\text{J g}^{-1}$ ).  $\eta$  represents the evaporation  
 2 efficiency of water bodies;  $q$  is the simulated solar intensity of vertical irradiation ( $\text{kW m}^{-2}$ ).  
 3 The evaporation rates of each sample shown in **Table S1** are calculated using formula (1)

4 **Table S1** The evaporation rates of the prepared photothermal sponges

| Photothermal sponges  | Evaporation rate ( $\text{kg m}^{-2} \text{h}^{-1}$ ) |
|-----------------------|-------------------------------------------------------|
| PVA                   | 0.75                                                  |
| PANI/PVA              | 2.04                                                  |
| PPy/PVA               | 2.28                                                  |
| PANI-PPy/PVA-1        | 2.45                                                  |
| PANI-PPy/PVA-2        | 2.53                                                  |
| PANI-PPy/PVA-3        | 2.58                                                  |
| PANI-PPy/PVA-4        | 2.18                                                  |
| PANI-PPy/PVA-5        | 2.56                                                  |
| PANI-PPy/PVA-6        | 2.60                                                  |
| CuNPs@ PANI-PPy/PVA-1 | 3.01                                                  |
| CuNPs@ PANI-PPy/PVA-2 | 3.24                                                  |
| CuNPs@ PANI-PPy/PVA-3 | 3.25                                                  |
| CuNPs@ PANI-PPy/PVA-4 | 3.84                                                  |
| CuNPs@ PANI-PPy/PVA-5 | 3.35                                                  |

5

## 6 Physical properties of CuNPs@PANI-PPy/PVA-4

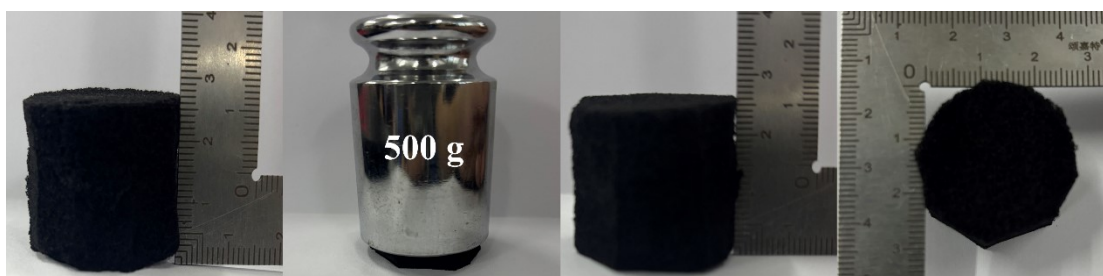

7

8 **Fig. S1** Compression and recovery of the CuNPs@PANI-PPy/PVA-4.

9 As shown in **Fig. S1**, the prepared CuNPs@PANI-PPy/PVA-4 is a dark green cylinder.

10 Before compression, the height of the sponge is approximately 27 mm. After loading a 500 g

1 weight, the sponge is significantly deformed. The CuNPs@PANI-PPy/PVA-4 sponge almost  
2 recovers the shape and height after unloading the weight, indicating the CuNPs@PANI-  
3 PPy/PVA-4 has good compression deformation and recovery performance.

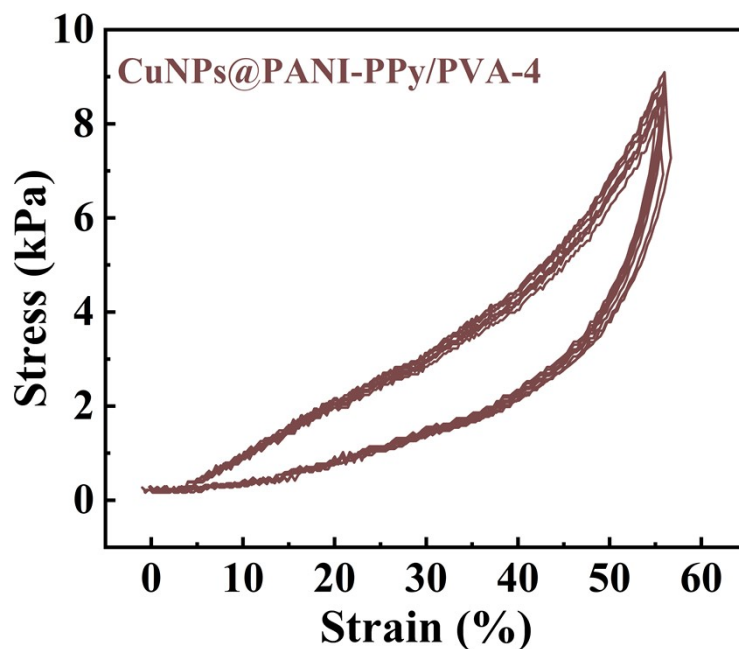

4  
5 **Fig. S2** 10 cycles compression recovery test of CuNPs@PANI-PPy/PVA-4 at 55% strain.  
6 Furthermore, 10 cycles of compression recovery test of CuNPs@PANI-PPy/PVA-4 are  
7 conducted at 55% strain. As shown in **Fig. S2**, the stress-strain curves of the samples during  
8 the cycling compression recovery test fit well together, demonstrating excellent compression  
9 recovery properties. Therefore, the CuNPs@PANI-PPy/PVA-4 sponge prepared has loose  
10 structure and low density characteristics.

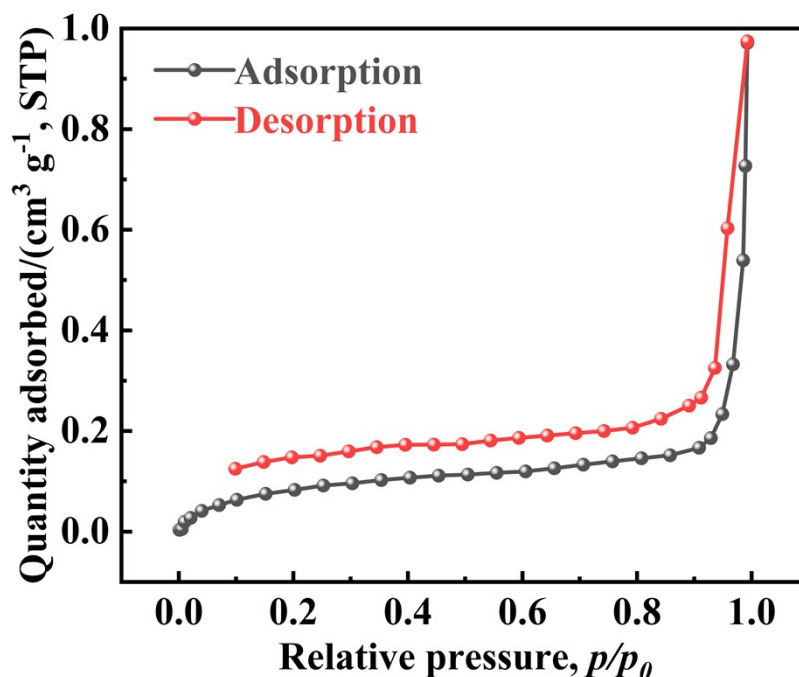

1

2 **Fig. S3** Nitrogen adsorption desorption isotherms of CuNPs@PANI-PPy/PVA-4.

3 Nitrogen desorption and adsorption test is conducted to characterize the porous structure of  
 4 CuNPs@PANI-PPy/PVA-4. In **Fig. S3**, the sponge demonstrates a type IV isothermal  
 5 adsorption curve, and its adsorption-desorption isotherms do not overlap, forming H1 type  
 6 hysteresis loop. The average pore size of the sponge is about 9.43 nm calculated by Barrett-  
 7 Joyner-Halenda (BJH) method. Therefore, the prepared sponge shows a mesoporous structure.  
 8 In addition, the specific surface area is about 1.68 m<sup>2</sup> g<sup>-1</sup> calculated by BET method. The  
 9 saturated adsorption platform existing in the curve reflects that the pore size of  
 10 CuNPs@PANI-PPy/PVA-4 is relatively uniform, which is conducive to water transport and  
 11 guarantee insufficient water supply during evaporation.

## 12 **Seawater desalination test**

13 As shown in **Fig. S4**, the purification effect of the simulated brine was evaluated by testing  
 14 the resistance of the purified water with a digital multimeter. The resistance of the water  
 15 collected by CuNPs@PANI-PPy/PVA-4 photothermal evaporation experiment was 135.88  
 16 kΩ, which was more than two orders of magnitude greater than the initially simulated real  
 17 seawater (2.15 kΩ), and exceeded the normal value of the drinking water (30.47 kΩ).  
 18 Therefore, the CuNPs@PANI-PPy/PVA-4 demonstrates good seawater desalination effect.

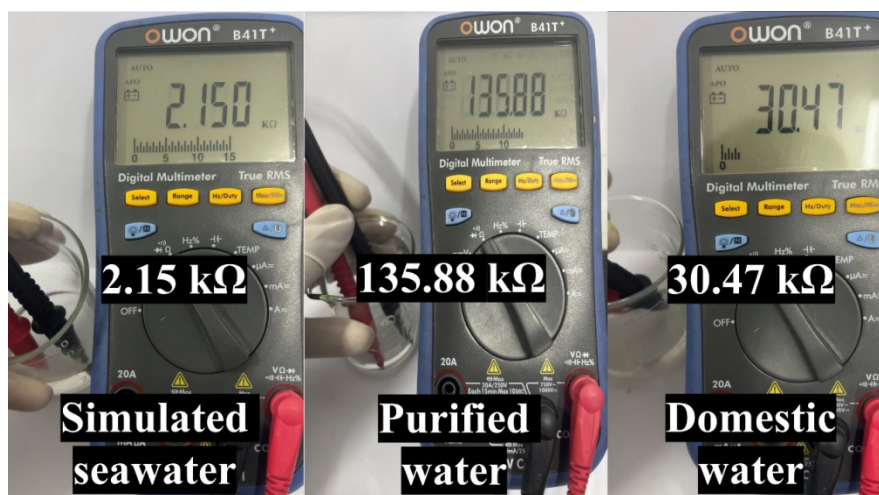

1  
2

**Fig. S4** The resistance of various water samples tested by a digital tester

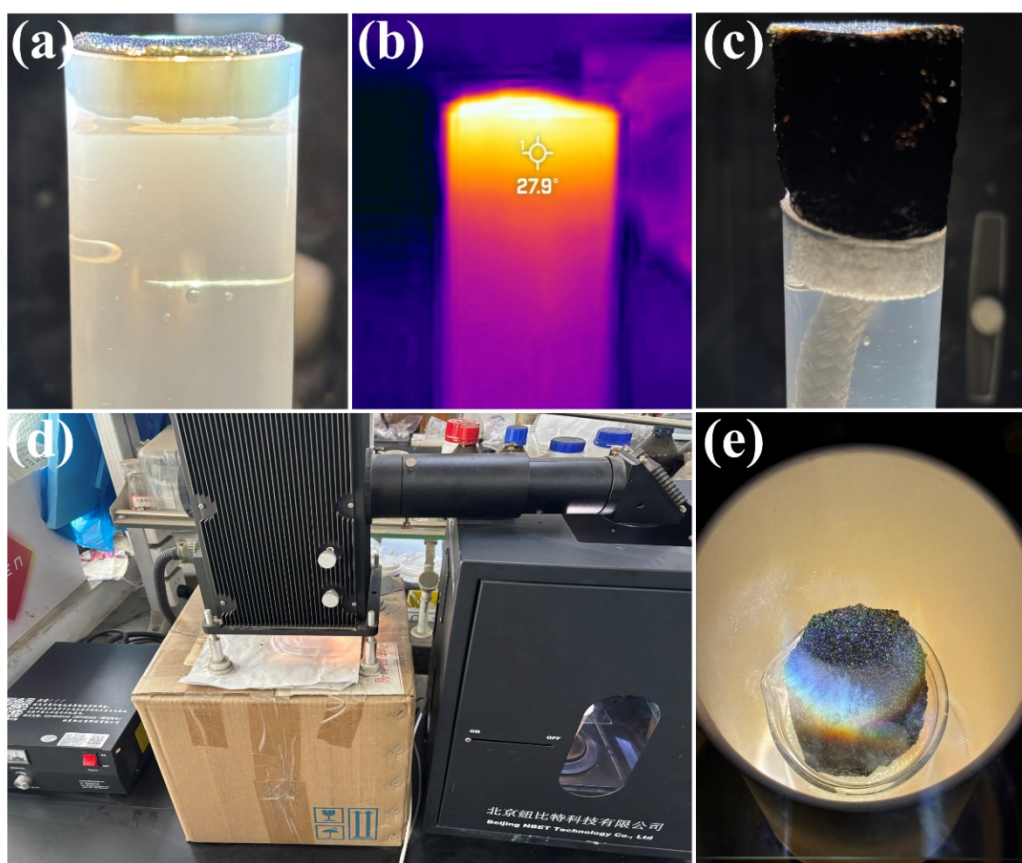

3

4 **Fig. S5** (a) Digital photo of the traditional floating solar evaporation device, (b) traditional  
5 floating solar evaporation device infrared digital photograph, (c) digital photo of a biomimetic  
6 stem-shaped solar evaporation device, (d) digital photo of the solar xenon lamp simulator, (e)  
7 photo of indoor water collection and purification device

8 As shown in **Figs. S5(a, b)**, the traditional floating solar evaporation system directly  
9 contacts the water surface, resulting in significant heat loss to the underlying water body  
10 during the evaporation process. As shown in **Fig. S5(c)**, the biomimetic stem-shaped solar

1 evaporation device has a piece of polystyrene foam between the bottom of the  
2 CuNPs@PANI-PPy/PVA-4 and the water source below, which can effectively isolate the heat  
3 in the CuNPs@PANI-PPy/PVA-4 from the water below. As the solar evaporation process  
4 progresses, the cotton strips at the bottom of the CuNPs@PANI-PPy/PVA-4 can continuously  
5 supply water to the CuNPs@PANI-PPy/PVA-4, ensuring that the CuNPs@PANI-PPy/PVA-4  
6 has sufficient water supply during the evaporation process. As shown in **Fig. S5(d)**, it is the  
7 solar xenon lamp simulator. As shown in **Fig. S5(e)**, CuNPs@PANI-PPy/PVA-4 was used for  
8 a simulated seawater desalination test in an indoor environment, and the process of collecting  
9 the purified water was carried out.

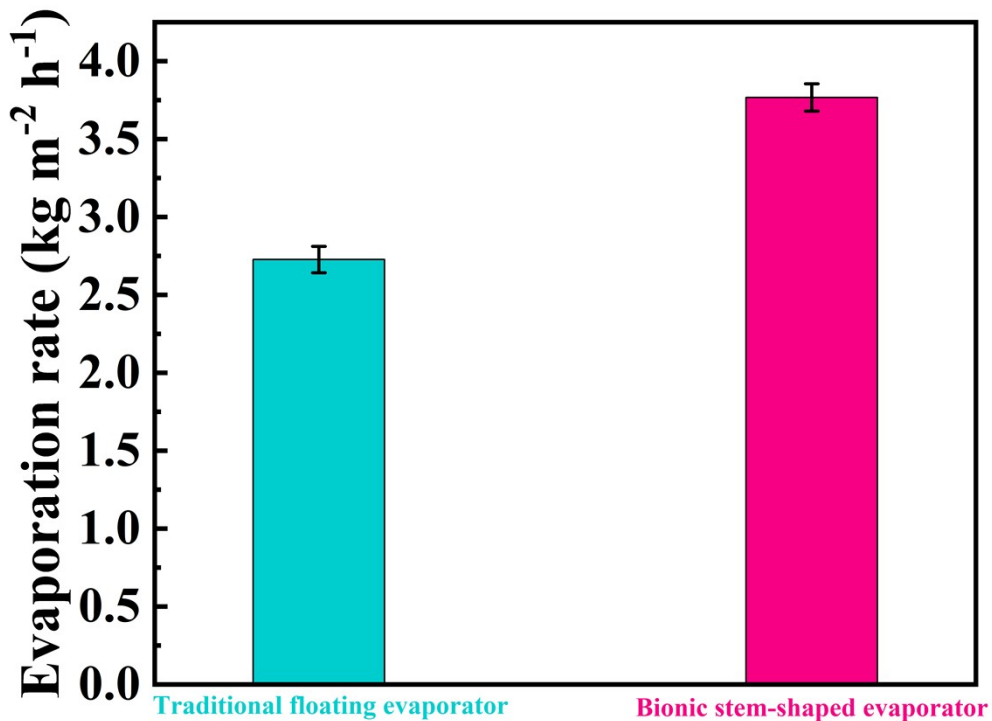

10  
11 **Fig. S6** Comparison chart of evaporation rates of the CuNPs@PANI-PPy/PVA-4 under two  
12 structural designs.

13 As shown in **Fig. S6**, the evaporation rate of the biomimetic stem-shaped evaporator is  
14 superior to that of the traditional floating evaporator.

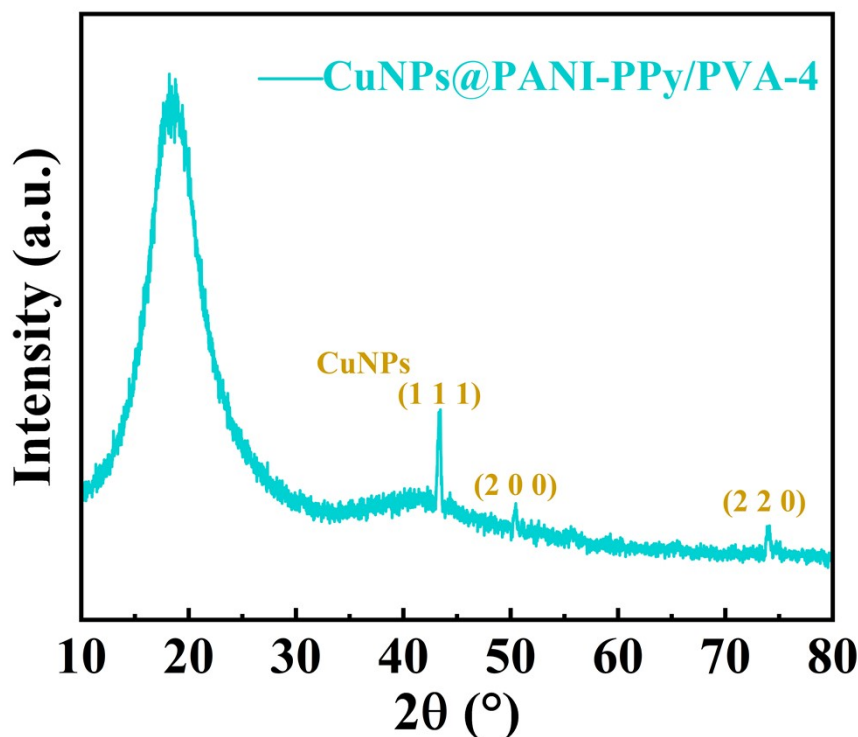

1

2 **Fig. S7** XRD spectra of the CuNPs@PANI-PPy/PVA-4 after the cyclic simulated seawater  
3 experiment

4 In order to determine the long-term stability of copper nanoparticles under high salinity  
5 and repeated evaporation conditions, we conducted XRD tests on the CuNPs@PANI-  
6 PPy/PVA-4 after the cyclic simulation of seawater evaporation experiments. As shown in the  
7 **Fig. S7**, the peaks of nano-copper still exist, indicating that it has certain long-term stability.

8 The PVA sponge has a porous structure, and the pores of the sponge enable the reverse  
9 diffusion of salt through capillary action. As shown in **Fig. S8**, upon evaporation of water in  
10 the upper sponge layer, salt residues remain in the pores; however, capillary action draws  
11 seawater upward to re-dissolve the salt. Driven by the concentration gradient, high-salinity  
12 seawater diffuses toward low-salinity regions, maintaining system salt balance. Subsequent  
13 continuous evaporation sustains this cyclic dynamic equilibrium, preventing significant salt  
14 accumulation in the sponge that would otherwise impair evaporation efficiency.

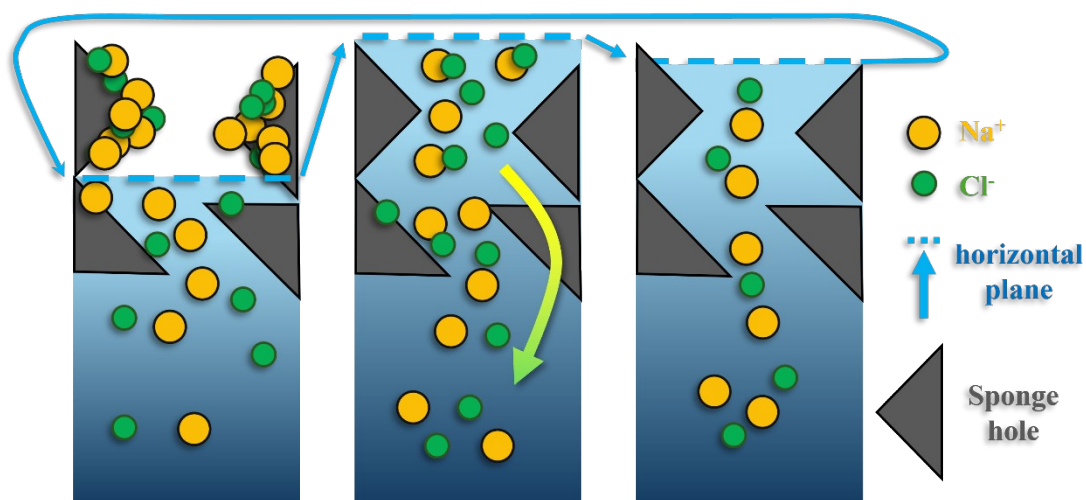

1  
2 **Fig. S8** Schematic of the Salt Back-Diffusion Mechanism

3 **Table S2** Concentration of  $\text{Cu}^{2+}$  in purified water measured by ICP-MS.

| Ions             | Analogue seawater<br>( $\text{mg L}^{-1}$ ) | Acid-base<br>wastewater ( $\text{mg L}^{-1}$ ) | Evaporated water<br>( $\text{mg L}^{-1}$ ) |
|------------------|---------------------------------------------|------------------------------------------------|--------------------------------------------|
| $\text{Cu}^{2+}$ | --                                          | --                                             | --                                         |

4  
5  
6  
7  
8 **Table S3** Detailed information about the outdoor simulation experiment of solar evaporation

| Time  | Solar flux ( $\text{kW m}^{-2}$ ) | Temperature ( $^{\circ}\text{C}$ ) |
|-------|-----------------------------------|------------------------------------|
| 11:00 | 907.7                             | 19.1                               |
| 12:00 | 844.8                             | 20.3                               |
| 13:00 | 901.7                             | 21.2                               |
| 14:00 | 897.4                             | 21.6                               |
| 15:00 | 662.8                             | 21.1                               |
| 16:00 | 33.0                              | 19.8                               |

9 **References**

10 1 X. Li, G. Ni, T. Cooper, N. Xu, J. Li, L. Zhou, X. Hu, B. Zhu, P. Yao and J. Zhu, *Joule*,  
11 2019, **3**, 1798–1803.  
12 2 T.A. Cooper, S.H. Zandavi, G.W. Ni, Y. Tsurimaki, Y. Huang, S.V. Boriskina and G. Chen,



- 1 Contactless steam generation and superheating under one sun illumination, *Nat. Commun.*,
- 2 2018, **9**, 5086.
